# Supplementary material for: Antiviral activity of luteolin against porcine epidemic diarrhea virus in silico and in vitro
Source: PubMed Central journal article supplement (PMC11221151; doi:10.1186/s12917-024-04053-4), 2024-07-03
Supplement: 12917_2024_4053_MOESM1_ESM.pdf [file 12917_2024_4053_MOESM1_ESM.pdf]

**Original blot images:**

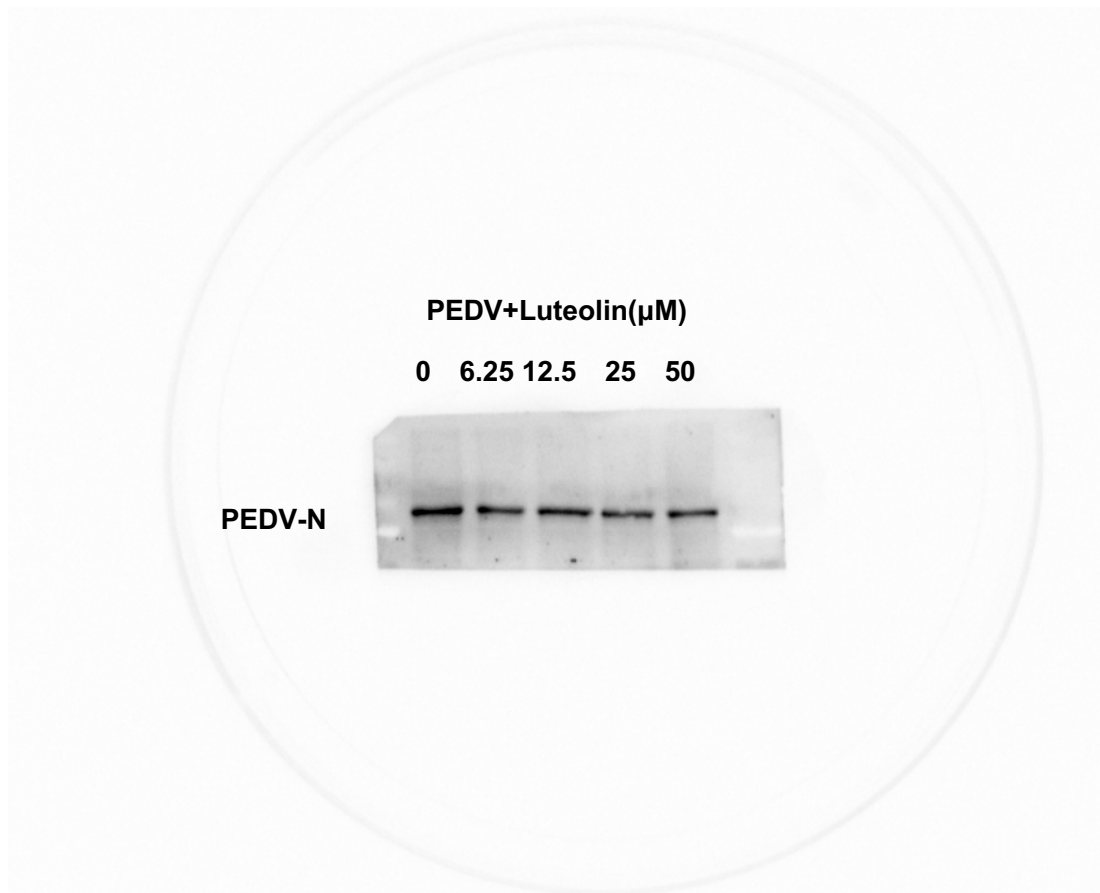

Figure 1: The expression of PEDV-N protein in Vero cells infected with PEDV and cultured with different concentrations luteolin (0, 6.25, 12.5, 25 and 50μM) by using western blot assay.

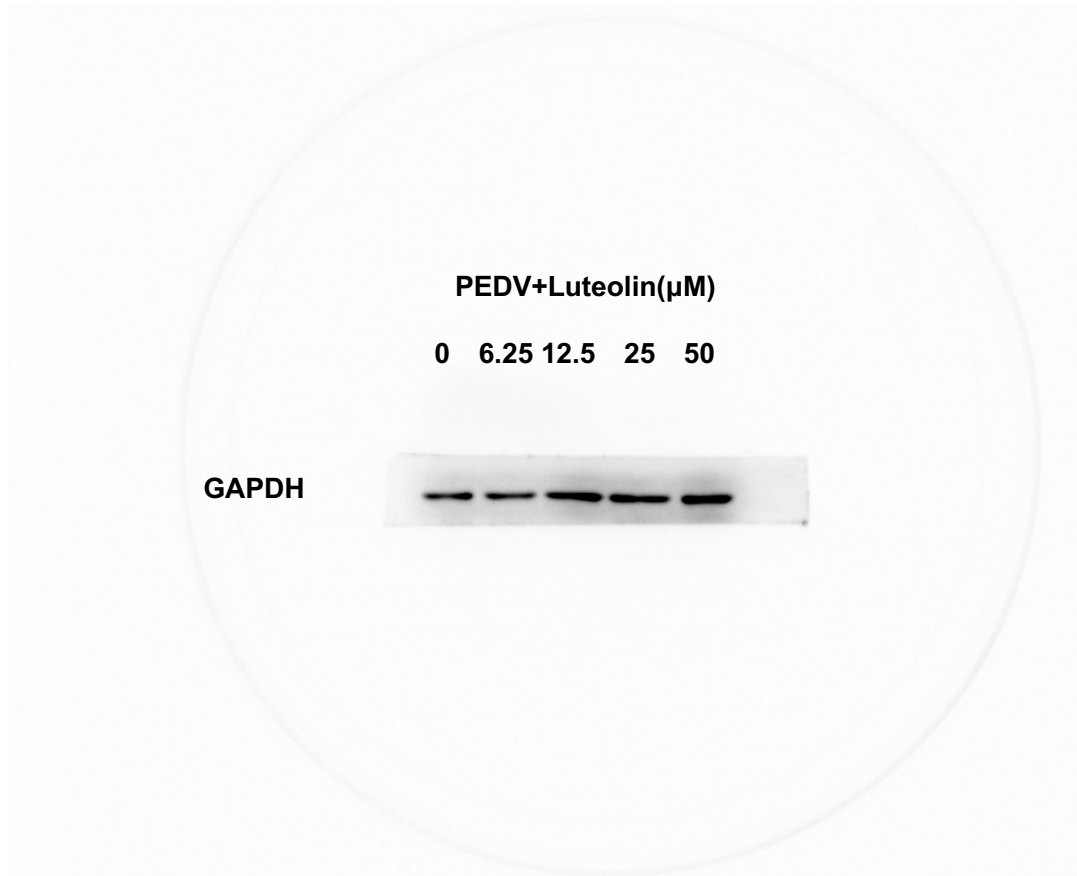

Figure 2: The expression of GAPDH protein in Vero cells infected with PEDV and cultured with different concentrations luteolin (0, 6.25, 12.5, 25 and 50 $\mu\text{M}$ ) by using western blot assay.
